# Supplementary material for: The role of the carotenoids, lutein and zeaxanthin, in protecting against age-related macular degeneration: A review based on controversial evidence
Source: Springer Nature journal article supplement (doi:10.1186/1475-2891-2-20), 2003-12-11
Supplement: Additional file 1 [file 1475-2891-2-20-s1.doc]

| **Table 1:** Summary of major epidemiological studies suggesting or contradicting a beneficial role of the carotenoids or other antioxidants in altering the pathogenesis of macular degeneration. | | | | |
| --- | --- | --- | --- | --- |
| Pro- Carotenoid/Antioxidants | | | | |
| **Title of study, principal author,and year of publication** | **Reference Number** | **Number of subjects examined** | **Stages of macular degeneration*** | **Conclusions of study** |
| Risk factors for neovascular  age-related macular degeneration.  (Eye Disease Case-Control  Study Group, 1992) | 31 | 421 subjects | 2***** | Decreased risk of AMD  was associated with  higher levels of carotenoids |
|  | 615 controls |  |
|  |  |  |
|  |  |  |
| A randomized , placebo-controlled,  clinical trial of high-dose  supplementation with vitamins  C and E, beta carotene, and  zinc for age-related macular  degeneration and vision loss.  (AREDS report Nn. 8, 2001) | 57 | 5000 subjects | 3***** | For subjects at high risk of  developing advanced stages  of AMD, use of the  combination of antioxdants  and zinc supplements  reduced that risk by 25%. |
|  |  |  |
|  |  |  |
|  |  |  |
|  |  |  |
|  |  |  |
|  |  |  |
| Antioxidant status and neovascular  age-related macular degeneration.  (The Eye-Disease Case Control  Group, 1993) | 67 | 421 subjects | 3***** | Persons with carotenoid  levels in serum had markedly  reduced risk of AMD with  levels of risk reduced to  1/2 and 1/3 respectively. |
|  | 615 controls |  |
|  |  |  |
|  |  |  |
|  |  |  |
| Dietary carotenoids, vitamin  A,C,and E, and advanced age-  related macular degeneration.  (Seddon JM, 1994) | 68 | 356 subjects | 2***** | Increasing the consumption  of foods rich in certain  carotenoids may reduce  the risk of developing  advanced or exudative AMD |
|  | 520 controls |  |
|  |  |  |
|  |  |  |
|  |  |  |
| Factors associated with age-  related macular degeneration:  an analysis of data from the First  National Health and Nutrition  Examination Survey.  (Goldberg J, 1988) | 70 | 3, 082 subjects | 3***** | Lower risk for macular  degeneration has been  associated with the  consumption of food  sources of these carotenoids. |
|  |  |  |
|  |  |  |
|  |  |  |
|  |  |  |
|  |  |  |
| Lutein and zeaxanthin in the diet  and serum and their relation to age-  related maculopathy in the Third  National Health and Nutrition  Examination Survey.  (Mares-Perlman JA, 1995) | 71 | 8229 subjects | 3***** | Higher levels of lutein and  zeaxanthin in the diet were  related to lower odds for early  ARM and late ARM. |
|  |  |  |
|  |  |  |
|  |  |  |
|  |  |  |
|  |  |  |
| Importance of alpha-carotene,  beta-carotene, and other  phytochemicals in the etiology  of lung cancer.  (Ziegler RG, 1996) | 73 | 763 subjects | 4***** | Beta –carotene and  carotenoids in a variety of  fruits and vegetables are  protective against lung cancer. |
|  | 564 controls |  |
|  |  |  |
|  |  |  |
|  |  |  |
|  |  |  |
| **Contro-Carotenoid/Antioxidants** | | | | |
| **Title of study, principal author,and year of publication** | **Reference Number** | **Number of subjects examined** | **Stages of macular degeneration*** | **Conclusions of study** |
| Effects of supplemental beta-  carotene, cigarette smoking, and  alcohol consumption on serum  carotenoids in the Alpha-  Tocopherol, Beta-carotene Cancer  Prevention Study.  (Albanes D, 1997) | 50 | 491 subjects | 4***** | Lutein concentrations were  significantly lower (11%) in  patients supplemented with  beta-carotene. |
|  |  |  |
|  |  |  |
|  |  |  |
|  |  |  |
|  |  |  |
|  |  |  |
| The effect of vitamin E and  beta-carotene on the incidence of  lung cancer and other cancers  in male smokers.  (The Alpha-Tocopherol, Beta  Carotene Cancer Prevention  Study Group, 1994) | 52 | 876 subjects | 4***** | No reduction in the incidence  of lung cancer among male  smokers was found after  5 to 8 years of dietary  supplementation with  alphatocopherol or beta carotene. |
|  |  |  |
|  |  |  |
|  |  |  |
|  |  |  |
|  |  |  |
|  |  |  |
| Association of zinc and antioxidant  nutrients with age-related  maculopathy. (Mares-Perlman JA, 1996) | 56 | 2152 subjects(Beaver Dam) | 3***** | The data is weakly supportive  of a protective effect of zinc  on the development of ARM. |
|  |  |  |
|  |  |  |
|  |  |  |
| Serum antioxidants and age-related  macular degeneration in a  population-based case control study.  (Mares-Perlman JA, 1995) | 69 | 167 Subjects | 3***** | Very low levels of one  (lycopene) but not other  dietary carotenoids or  tocopherols were related  to ARM. |
|  | 167 controls |  |
|  |  |  |
|  |  |  |
|  |  |  |
| Associations between antioxidant  and zinc intake and the 5-year  incidence of early age-related  maculopathy in the Beaver  Dam Eye Study.  (Vandenlangenberg GM, 1988) | 72 | 1,709 subjects | 3***** | No significant inverse  associations were found  between antioxidant or zinc  intake and the incidence  of ARM. |
|  |  |  |
|  |  |  |
|  |  |  |
|  |  |  |
|  |  |  |
| Effects of a combination of beta-  carotene and vitamin A on lung  cancer and cardiovascular disease.  (Omenn GS, 1996) | 74 | 18,314 subjects | 4***** | After an average of 4 years  of supplementation, the  combination of beta carotene  and vitamin A had no benefit  and may have had an adverse effect on the incidence of  lung cancer. |
|  |  |  |
|  |  |  |
|  |  |  |
|  |  |  |
|  |  |  |
|  |  |  |

*** 1- ARM, 2- AMD, 3- ARM/AMD combined, 4- Neither**
