# Supplementary material for: The role of the carotenoids, lutein and zeaxanthin, in protecting against age-related macular degeneration: A review based on controversial evidence
Source: Springer Nature journal article supplement (doi:10.1186/1475-2891-2-20), 2003-12-11
Supplement: Additional file 2 [file 1475-2891-2-20-S2.doc]

| **Table 2:** Summary of major clinical studies suggesting or contradicting a beneficial role of the carotenoids or other antioxidants in altering the pathogenesis of macular degeneration. | | | | |
| --- | --- | --- | --- | --- |
| Pro carotenoid | | | | |
| **Title of study, principal author,and year of publication** | **Reference Number** | **Number of subjects examined** | **Stages of macular degeneration*** | **Conclusions of study** |
| Lutein and zeaxanthin concentrations  in plasma after dietary  supplementation with egg yolk.  (Handelman GJ, 1999) | 20 | 11 subjects | 4***** | Egg yolk is a highly bioavailable source of lutein and zeaxanthin. Plasma concentrations are elevated ( plasma lutein by 28%, and zeaxanthin by 128%)  after supplementation. |
|  |  |  |
|  |  |  |
|  |  |  |
|  |  |  |
|  |  |  |
| A one year study of the  macular pigment : the effect of  140 days of a lutein supplement.  ( Landrum JT, 1997) | 21 | 2 subjects | 4***** | The modest period of  supplementation has been  estimated to have produced  in the subjects a 30% to 40% reduction in blue light reaching the vulnerable tissues affected by AMD. |
|  |  |  |
|  |  |  |
|  |  |  |
|  |  |  |
|  |  |  |
|  |  |  |
| Influence of lutein supplementation on macular pigment, assessed with two objective techniques.  (Berendschot TTJM, 1997) | 22 | 8 subjects | 4***** | Supplementation with lutein  significantly increased the  density of MP. |
|  |  |  |
|  |  |  |
|  |  |  |
| Relation among serum and tissue concentrations of lutein and zeaxanthin and macular  pigment density. (Johnson EJ, 2000) | 44 | 7 subjects | 4***** | Serum and buccal cell  concentrations of lutein  increased significantly from  baseline during dietary  modification. Sex ifferences  in lutein metabolism may be  an important factor in  determining MP density. |
|  |  |  |
|  |  |  |
|  |  |  |
|  |  |  |
|  |  |  |
|  |  |  |
|  |  |  |
| Oral zinc in macular degeneration.  (Newsome DA, 1988) | 55 | 151 subjects | 4***** | High dose zinc was reported to reduce the loss of visual acuity in patients with AMD after a follow-up of 12 to 24 months. |
|  |  |  |
|  |  |  |
|  |  |  |
| Macular pigment and risk for age-related macular degeneration in subjects from a Northern European population.(Beatty S, 2001) | 87 | 46 eyes with healthy maculae, | 2***** | Supplemental lutein and  zeaxanthin may delay, avert or modify the course of AMD. |
|  | 9 eyes known to be at high risk of |  |
|  | AMD, matched control subjects. |  |
| Macular pigment in donor eyes with and without AMD:  a case-control study.  (Bone RA, 2001) | 88 | 56 donors | 2***** | Results were consistent with a  theoretical model that proposes  an inverse association between  the risk of AMD and the  amount of lutein and  zeaxanthin in the retina. |
|  | 56 controls |  |
|  |  |  |
|  |  |  |
|  |  |  |
|  |  |  |
| Contro carotenoid | | | | |
| **Title of study, principal author,and year of publication** | **Reference Number** | **Number of subjects examined** | **Stages of macular degeneration*** | **Conclusions of study** |
| Dietary modification of human  macular pigment density.  (Hammond Br Jr, 1997) | 19 | 13 subjects | 4***** | Increases in MP density were obtained within 4 weeks of dietary modification for most,  but not all subjects. |
|  |  |  |
|  |  |  |
|  |  |  |
|  |  |  |
| Effects of 4y of oral supplementation  with beta-carotene on serum  concentrations of retinol,  tocopherol, and five carotenoids.  ( Nierenberg DW, 1997) | 46 | 54 subjects | 4***** | The findings suggest that beta-carotene supplementation does  not significantly change serum concentrations of other carotenoids |
|  | 54 placebo controls |  |
|  |  |  |
|  |  |  |
|  |  |  |
| Effect of beta-carotene  supplementation on the concentrations  and distribution of carotenoids,  vitamin E, vitamin A and  cholesterol in plasma lipoprotein  and non-lipoprotein fractions  in healthy older women.  (Ribaya-Mercado JD, 1995) | 48 | 10 subjects | 4***** | Supplementation with beta-  carotene has no effect on the amount and relative distribution of lutein and/or zeaxanthin. |
|  | 10 placebo controls |  |
|  |  |  |
|  |  |  |
|  |  |  |
|  |  |  |
|  |  |  |
|  |  |  |
|  |  |  |
|  |  |  |
| Plasma carotenoid response to  chronic intake of selected foods and beta-carotene supplements in men.(Micozzi MS, 1992) | 49 | 30 subjects consuming | 4***** | Recipients of beta-carotene  capsules had lower  concentrations of plasma lutein after six weeks. |
|  | carotenoids from foods, |  |
|  | 12 subjects consuming beta |  |
|  | carotene capsules. |  |
|  |  |  |
|  |  |  |
| Changes in plasma carotenoid and vitamin E profile during supplementation with oil palm fruit carotenoids. (Faulks RM, 1998) | 51 | 15 subjects | 4***** | Plasma concentrations of diet derived lutein was depressed in patients supplemented for 35 days with an oil palm fruit extract rich in beta and alpha  carotene (15mg/d). |
|  |  |  |
|  |  |  |
|  |  |  |
|  |  |  |
|  |  |  |

*** 1- ARM, 2- AMD, 3- ARM/AMD combined, 4- Neither**
